# LSD microdosing attenuates the impact of temporal priors in time perception.

Abbreviated title: **LSD-attenuated impact of priors in time perception**

Renata Sadibolova<sup>1,2</sup>, Clare Murray-Lawson<sup>3</sup>, Neiloufar Family<sup>4</sup>, Luke T. J. Williams<sup>5</sup>, David P. Luke<sup>6</sup>, & Devin B. Terhune<sup>1,2</sup>

<sup>1</sup> *Department of Psychology, Goldsmiths, University of London, London, UK*

<sup>2</sup> *Department of Psychology, IoPPN, King's College London, London, UK*

<sup>2</sup> *Department of Neuroscience, Carleton University, Ontario, Canada*

<sup>4</sup> *Eleusis Therapeutics Ltd, London, UK*

<sup>5</sup> *Centre for Psychiatry, Division of Brain Sciences, Imperial College London, London, UK*

<sup>6</sup> *Centre for Mental Health, School for Human Sciences, University of Greenwich, London, UK*

Corresponding author:

Renata Sadibolova ([renata.sadibolova@kcl.ac.uk](mailto:renata.sadibolova@kcl.ac.uk))

Devin B. Terhune ([devin.terhune@kcl.ac.uk](mailto:devin.terhune@kcl.ac.uk))

Conflict of interest:

NF, LTJW, DPL, and DBT were paid consultants of Eleusis Benefit Corporation (USA) at the time of the clinical trial.

Acknowledgements:

This work was supported by the Biotechnology and Biological Sciences Research Council Grant BB/R01583X/1 to DBT.

28  
29  
30  
31  
32  
33  
34  
35  
36  
37  
38  
39  
40  
41  
42  
43  
44  
45  
46  
47  
48  
49  
50  
51

## Abstract

Recent theoretical work embedded within the predictive processing framework has proposed that the neurocognitive and therapeutic effects of psychedelics are driven by the modulation of priors (Carhart-Harris & Friston, 2019). We conducted pre-registered re-analyses of previous research (Yanakieva et al., 2019) to examine whether microdoses of lysergic acid diethylamide (LSD) alleviate the temporal reproduction bias introduced by priors, as predicted by this theoretical framework. In a between-groups design, participants were randomly assigned to one of four groups receiving LSD (5, 10, or 20  $\mu\text{g}$ ) or placebo (0  $\mu\text{g}$ ) and completed a visual temporal reproduction task spanning subsecond to suprasecond intervals (0.8 to 4 sec). Using mixed-effects modelling, we evaluated the impact of the treatment group, and of the overall history of stimulus intervals (*global* priors) and the local stimulus history (*local* priors), weighted by their respective precision weights (inverse of variance), on temporal reproduction. Our principal finding was that the precision-weighted local priors and their precision weights reduced the under-reproduction bias observed under LSD in the original research. Furthermore, controlling for the precision-weighted local prior eliminated the reduced temporal reproduction bias under LSD, indicating that LSD microdosing mitigated the temporal under-reproduction by reducing the relative weighting of priors. These results suggest that LSD microdosing alters human time perception by decreasing the influence of local temporal priors.

Keywords: temporal prior; time perception; temporal reproduction bias; LSD; microdosing;

52

## Introduction

53 Over the past decade, there has been a renewed interest in the neurocognitive  
54 effects of psychedelics, with recent clinical and basic research demonstrating this  
55 trend (Calder & Hasler, 2022; Carhart-Harris & Goodwin, 2017; Johnston et al.,  
56 2023; Lewis-Healey et al., 2022; Nichols, 2016). One influential model explaining the  
57 effects of psychedelics is the “Relaxed Beliefs Under Psychedelics” (REBUS) model,  
58 (Carhart-Harris & Friston, 2019), which proposes that these substances relax the  
59 weights on expectations based on prior experiences (priors). Our perception is  
60 influenced by our past sensory experiences, and according to the REBUS model, the  
61 relaxation of these priors under psychedelics can lead to higher thresholds for  
62 susceptibility to illusions and less perceptual bias (Carhart-Harris & Friston, 2019).  
63 Here we investigated whether the bias in temporal reproduction may be moderated  
64 by LSD’s influence on temporal priors.

65 Information about the external environment processed via sensory channels often  
66 varies in quality and is combined with prior predictions for an optimal outcome to  
67 guide decision making (Friston, 2009; Körding & Wolpert, 2006; Raviv et al., 2012).  
68 When priors and incoming information misalign, prediction errors arise, and the  
69 perceptual system strives to reduce the uncertainty. Precise priors are afforded  
70 higher weighting and override prediction errors but they are attenuated and updated  
71 when higher precision weights are afforded to incoming signals (Clark, 2013).  
72 Psychedelics are thought to mitigate the influence of priors, thus yielding increased  
73 confidence in bottom-up information, with potential therapeutic benefits for  
74 psychiatric disorders hypothesized to be characterized by pathologically over-  
75 weighted priors (Cassidy et al., 2018; Powers et al., 2016; Teufel et al., 2015).  
76 Recent research has supported this hypothesis, showing that psychedelics can

77 reduce the prior precision weighting, leading to a more flexible and exploratory  
78 process of perception and cognition (Leptourgos et al., 2022; Muthukumaraswamy et  
79 al., 2013; Rajpal et al., 2022).

80 In addition to their effect on priors, psychedelics have been shown to modulate  
81 time perception (Coull, Morgan, et al., 2011; Kenna & Sedman, 1964; Wittmann et  
82 al., 2007; Yanakieva et al., 2019). For instance, Yanakieva et al. (2019) found that  
83 LSD reduced under-reproduction bias in their participants' perception of stimulus  
84 durations compared to the placebo group (Fig. 2 in Yanakieva et al., 2019).  
85 However, whether the under-reproduction could be attributed to the influence of  
86 temporal priors that was mitigated in the LSD group was not assessed. Accumulating  
87 research has shown that interval timing performance can be modelled as a form of  
88 Bayesian inference (Karaminis et al., 2016; Sadibolova & Terhune, 2022; Shi et al.,  
89 2013; Shi & Burr, 2016), thereby offering the possibility of scrutinizing the predictions  
90 of REBUS model through the analysis of the impact of psychedelics on temporal  
91 priors. In particular, Bayesian models of time perception posit that the brain forms  
92 temporal priors by extracting statistical patterns from the environment such as the  
93 mean duration of stimulus intervals (*global prior*, Acerbi et al., 2012; Jazayeri &  
94 Shadlen, 2010) and that temporal duration estimates gravitate towards the stimulus  
95 duration in previous trials (*local prior*, de Jong et al., 2021; Wiener et al., 2014).  
96 These priors are combined with sensory evidence regarding the duration of a  
97 stimulus and can introduce temporal biases (Acerbi et al., 2012; Cicchini et al., 2012)  
98 that may be mitigated by administration of psychedelics.

99 In summary, by integrating the REBUS model into the predictive coding  
100 framework, it is possible to gain a more comprehensive understanding of the effects  
101 of psychedelics on time perception. Insofar as the pattern of findings by Yanakieva et

102 al. (2019) conforms to the predictions of the REBUS model of the diminished impact  
103 of priors under psychedelics, we re-analyzed their data to investigate the possibility  
104 that their observations may be accounted for by global and local temporal priors  
105 interacting with the drug treatment. We predicted that the reduced impact of priors  
106 under psychedelics would remedy the temporal reproduction bias (i.e., the tendency  
107 for reproduced intervals to shift toward priors and away from objective interval  
108 durations).

109

110

111

## Materials and Methods

112

### Participants

114 This study involves re-analyses of previous data (Yanakieva et al., 2019); our  
115 analyses were preregistered on the Open Science Framework (<https://osf.io/hfkjr>).  
116 The participants were 48 English-speaking adults, aged 55-75 (Mean age = 62.92,  
117 21 female [44%], 27 male [56%]). Participants were randomly assigned to one of four  
118 groups ( $n=12$ ) that received either LSD (5, 10, or 20  $\mu\text{g}$ ) or a placebo (0  $\mu\text{g}$ ). The  
119 removal of 2 multivariate outliers (one each from the 5 and 20  $\mu\text{g}$  dose groups [see  
120 Yanakieva et al., 2019]) reduced the final sample size to 46.

121

### Experimental design

123 The data collection took place in an inpatient unit, adhering to standardized pre-  
124 screening and medical protocols (Yanakieva et al., 2019) as part of a larger pre-  
125 clinical trial on the safety and efficacy of microdose LSD (Family et al., 2020). The  
126 study used a randomized, double-blind, placebo-controlled design. The LSD solution

127 was prepared in distilled water at a pharmacy on-site, and placebo groups were  
128 administered only distilled water, rendering the LSD and placebos indistinguishable  
129 to researchers and participants. The manufacturer of the drug product was Onyx  
130 Scientific Limited UK, to cGMP standards (Yanakieva et al., 2020).

131 Participants completed a temporal reproduction task once post-dose on the 4th  
132 day of dosing with the specific time of completion varying across participants  
133 (Yanakieva et al., 2019). Each trial of the task consisted of a fixed 750 ms cue  
134 “*memorize*”, a blank jittered interval (425–650 ms), and a target stimulus interval  
135 (blue circle [80 × 80 pixels; ~2 cm in diameter], on a 1280 × 800 pixel-monitor) of  
136 varying duration (800, 1200, 1600, 2000, 2400, 2800, 3200, 3600, or 4000 ms). The  
137 stimulus was followed by a fixed 500 ms blank interval and a response cue  
138 “*reproduce*”, at which point participants responded by holding down the space bar to  
139 reproduce the stimulus interval. A blue circle co-appeared with this response and  
140 remained on the monitor until the spacebar was released. Trials were separated by a  
141 fixed 500 ms blank interstimulus interval. Participants completed one practice block,  
142 followed by four experimental blocks of 27 trials (108 trials total).

143

## 144 **Statistical analysis**

145 We first removed bivariate outlier responses across stimulus intervals for each  
146 participant ( $M=8.37\%$ ,  $SD=2.95\%$ , range: 1.85-14.81%) identified with the median  
147 absolute deviation (MAD) method implemented in the robust correlation toolbox  
148 (Pernet et al., 2013) in MATLAB (MathWorks, Natick, USA).

149 Data were analyzed with mixed effects modelling using the *lme4* package (Bates  
150 et al., 2015) in R (R Core Team, 2021). Our experimental design is characterized by  
151 a hierarchical structure (Figure S1 in supplemental materials) with *participants*

152 (categorical; 46 levels) nested in the *dose* (continuous) and the dose nested in  
153 *cohorts* (categorical; 4 levels). As per Yanakieva et al. (2019), we created another  
154 dichotomous variable *drug* comprised of placebo and LSD levels which was included  
155 in our models instead of the *dose*. The models included additional continuous  
156 variables *stimulus interval* and *prior*. We further distinguished between different  
157 types of priors. The global prior was calculated at each trial (starting from trial 3) as  
158 the arithmetic mean of all preceding intervals. There were three local priors: the last  
159 preceding stimulus interval (*n-1 prior*), and the arithmetic means of the last preceding  
160 two intervals (*n-2 prior*) and three intervals (*n-3 prior*). The continuous variables  
161 (reproduced intervals, stimulus intervals, and priors) were mean-centered and the  
162 categorical variables (*drug* and *cohort*) were dummy coded.

163 Mixed-effects models were fitted using restricted maximum likelihood (REML)  
164 and the nonlinear “*nlopt\_in\_neldermead*” optimizer (Wächter & Biegler, 2006) with  
165 tighter tolerance values ( $1e^{-12}$ ). Model fit improvement was determined by a change  
166 in the log-likelihood (increases with goodness of fit), and log-likelihood derived  
167 Bayesian Information Criterion (BIC; Schwarz, 1978) and Akaike Information criterion  
168 (AIC; Akaike, 1974) (both decrease with superior goodness of fit). We refrained from  
169 using the  $\chi^2$ -distributed log-likelihood ratio test for model comparison as it’s been  
170 reported to produce anti-conservative *p*-values (Pinheiro & Bates, 2000). Instead, we  
171 applied Kenward and Roger’s approximation of degrees of freedom for *F*-test *p*-  
172 values and we computed the *p*-values for fixed effects parameters with Kenward and  
173 Roger’s method, as implemented in the “*pbkrtest*” and “*afex*” R packages (Halekoh &  
174 Højsgaard, 2014; Kuznetsova et al., 2017; Singmann et al., 2018). Furthermore, we  
175 employed the type III sums of squares method, which is suitable for unbalanced  
176 designs (Keppel & Wickens, 2004), due to sample size differences between the drug

177 and placebo groups. To generate reliable estimates of uncertainty, we used the  
178 “*bootMer*” function to compute the bootstrapped 95% confidence intervals with 100  
179 iterations. To further investigate the interaction effects, we conducted additional post  
180 hoc tests such as t-tests.

181 In order to determine the random-effects structure for the mixed-effects model,  
182 we began by generating null ('empty') models (Quené & van den Bergh, 2004)  
183 comprising distinct random-effects structures (Barr et al., 2013), as outlined in  
184 Section S2 of the Supplementary Materials, which also includes the model  
185 diagnostics. The final random-effects structure of the model with the lowest BIC and  
186 AIC included correlated by-subject within-dose within-cohort intercepts and slopes  
187 for stimulus intervals. It was applied in all subsequent mixed-effects model analyses  
188 with fixed-effects parameters (stimulus intervals, drug, priors, and interactions  
189 thereof). Different priors were evaluated in separate models.

190

### 191 ***Unregistered prior precision-weights***

192 In our registered analyses, we conceptualized priors as stimulus history, but did  
193 not take into account the crucial role of their precision weighting before their  
194 integration with sensory evidence (likelihood) (Petzschner et al., 2015; Sadibolova &  
195 Terhune, 2022; Shi et al., 2013; Shi & Burr, 2016). To rectify this omission, we  
196 replicated our registered analyses using prior precision weights, with higher values  
197 reflecting lower uncertainty for prior evidence, and precision-weighted priors. We  
198 calculated the precision weights as the inverse of variance for the prior normalized  
199 by the sum of inverse variances of the prior and likelihood (Petzschner et al., 2015).  
200 The initial prior precision at each trial was the inverse of the variance of all preceding  
201 trials (*global* priors), the preceding two trials ( $n-2$  priors), and the preceding three



202 trials ( $n-3$  priors). We computed the likelihood variance for each trial by measuring  
203 the variability in reproduced intervals after regressing out the influence of priors,  
204 following the method introduced by Aston and colleagues (2021). For global priors,  
205 we regressed the preceding responses on the stimulus intervals and divided the  
206 variance of the residuals by the squared slope to remove the central tendency bias  
207 (Aston et al., 2021) whereas for the local priors, we regressed the reproduced  
208 intervals on each prior itself. As with the prior precision estimates, the initial  
209 likelihood precision was computed as the inverse of the likelihood variance.

210

211

## 212 Results

213

### 214 LSD attenuates performance bias in temporal reproduction

215 Our first expectation was for the mixed effects model to replicate the difference in  
216 reproduced supra-second intervals between the placebo and LSD treatment groups  
217 (Yanakieva et al., 2019). Our analyses replicated the reduced under-reproduction of  
218 stimulus intervals longer than 2 s (Yanakieva et al., 2019) in the LSD relative to the  
219 placebo condition (Figure 1). In particular, the null model including the by-subject  
220 within-dose within-cohort intercepts and slopes for intervals (AIC=4020, BIC=4050)  
221 improved with the inclusion of Stimulus interval as a fixed-effects parameter  
222 (*Baseline model*),  $F(1,44.99) = 829.49$ ,  $p < .001$ ,  $AIC=3885$ ,  $BIC=3922$ . The fit was  
223 further improved with the inclusion of Drug and Stimulus interval\*Drug fixed-effects  
224 predictors (*Replication model*),  $F(2,42.66) = 4.91$ ,  $p = .012$ ,  $AIC=3880$ ,  $BIC=3929$   
225 (Table 1). The Stimulus interval,  $\beta = .64$  (95% CI [.54, .73]),  $SE = .05$ ,  $t = 13.44$ ,  $p < .001$ ,  
226 Drug,  $\beta = .24$  (95% CI [.08, .39]),  $SE = .10$ ,  $t = 2.37$ ,  $p = .022$ , and Stimulus interval x Drug

227 interaction,  $\beta=.17$  (95% CI [.07, .27]),  $SE=.06$ ,  $t=3.04$ ,  $p=.004$ , predictors were all  
228 statistically significant. These results suggest a .64s increase in reproduced intervals  
229 for each 1s stimulus increment irrespective of the drug condition, reflecting a  
230 shallower slope than would be expected with veridical performance. However,  
231 relative to the placebo condition, the reproduced intervals under LSD were longer by  
232 .24s on average and they rose by .17s per 1s actual increment across stimulus  
233 intervals. Cumulatively, these results demonstrate that LSD induced a decrease in  
234 the temporal under-reproduction bias, resulting in a shift towards a more accurate  
235 and veridical performance.

236

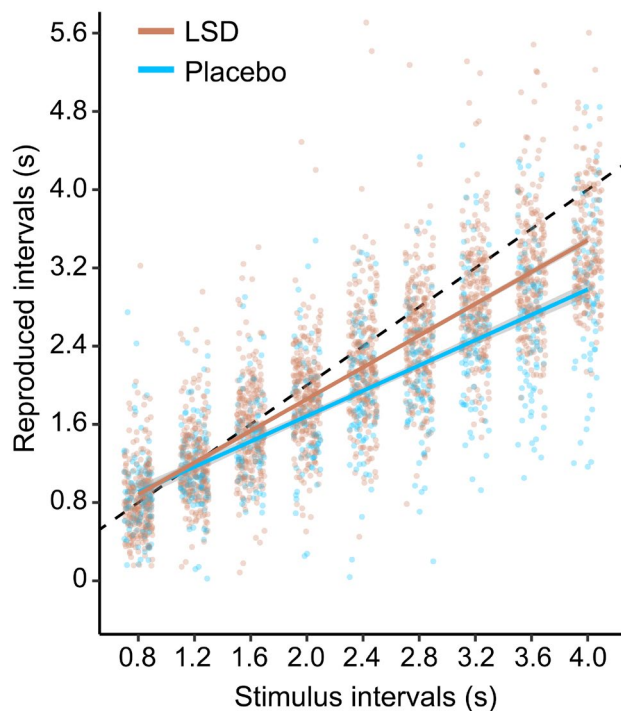

237

238 *Figure 1.* Temporal reproduction of stimulus intervals in LSD and placebo groups.

239 The black dashed line represents veridical performance. Markers represent  
240 individual reproduced intervals. Shaded error bars are standard error smoothed with  
241 the linear *geom\_smooth* function in R.

242

243

## 244 **The influence of priors on temporal reproduction**

245       In the next subsections (also see Tables **1** and **S2**), we describe how the  
246 inclusion of global and local priors improved the model already including the stimulus  
247 and drug predictors. Motivated by the proposal that psychedelics modulate cognition  
248 and perception by attenuating prior precision weighting (Carhart-Harris & Friston,  
249 2019), we predicted that temporal priors would predict reproduced intervals  
250 (*Baseline model* improvement) and that this effect would differ between LSD and  
251 placebo conditions (*Replication model* improvement).

252

253 Table 1  
 254 Comparison of baseline and replication mixed-effects models of temporal  
 255 reproduction performance in placebo and LSD conditions.

|                                 | Baseline model |          | Replication model |          | AIC           | BIC           | LL             |
|---------------------------------|----------------|----------|-------------------|----------|---------------|---------------|----------------|
|                                 | improvement    |          | improvement       |          |               |               |                |
|                                 | <i>F</i>       | $\chi^2$ | <i>F</i>          | $\chi^2$ |               |               |                |
| Baseline model                  |                |          |                   |          | 3885.9        | 3922.1        | -1937.0        |
| Replication model               |                |          |                   |          | 3880.4        | 3928.8        | -1932.2        |
| Global prior unweighted         | 3.96           | 23.63    | 3.54              | 14.16    | <b>3874.3</b> | 3946.8        | <b>-1925.1</b> |
| Global prior precision-weighted | 5.38           | 30.93    | 5.64              | 21.46    | <b>3867.0</b> | 3939.5        | <b>-1921.5</b> |
| Global prior precision weights  | 4.54           | 25.65    | 4.32              | 16.18    | <b>3872.3</b> | 3944.7        | <b>-1924.1</b> |
| n-1 prior unweighted            | 12.46          | 74.63    | 16.44             | 65.17    | <b>3823.3</b> | <b>3895.8</b> | <b>-1899.6</b> |
| n-2 prior unweighted            | 10.13          | 60.73    | 12.90             | 51.26    | <b>3837.2</b> | <b>3909.7</b> | <b>-1906.6</b> |
| n-2 prior precision-weighted    | 4.99           | 29.38    | 4.97              | 19.91    | <b>3868.5</b> | 3941.0        | <b>-1922.3</b> |
| n-2 prior precision-weights     | 4.50           | 26.58    | 4.28              | 17.11    | <b>3871.3</b> | 3943.8        | <b>-1923.7</b> |
| n-3 prior unweighted            | 9.03           | 54.17    | 11.23             | 44.70    | <b>3843.7</b> | <b>3916.2</b> | <b>-1909.9</b> |
| n-3 prior precision-weighted    | 3.93           | 22.58    | 3.28              | 13.11    | <b>3875.3</b> | 3947.8        | <b>-1925.7</b> |
| n-3 prior precision-weights     | 4.89           | 28.94    | 4.90              | 19.47    | <b>3869.0</b> | 3941.4        | <b>-1922.5</b> |

Notes. The baseline model included the intercept and Stimulus interval as fixed-effects parameters. The replication model additionally included Drug and Stimulus interval\*Drug interaction as fixed-effects parameters. Rows represent the mixed effects model with a prior parameter added to the two different models. All *F* statistics are significant,  $p \leq .01$ . AIC = Akaike information criterion, BIC = Bayesian information criterion, LL = Log-likelihood. Bolded values reflect models exhibiting superior fit to both the baseline and replication model. The color gradient for each, the AIC, BIC and LL values indicates the model fit quality (yellow = worse, green = better) by comparing all models in the respective table column.

256

257

258 ***Global priors (unweighted)***

259 We first considered the role of global priors calculated as the mean of previous  
260 stimulus intervals at each trial. The global prior distribution is conventionally centered  
261 at the mean interval range, and research has demonstrated its association with  
262 central tendency bias in time perception, resulting in an overestimation of short  
263 intervals and underestimation of long intervals (Acerbi et al., 2012; Cicchini et al.,  
264 2012). The impact of including global priors in the *Baseline model* and *Replication*  
265 *model* is inconclusive (Table 1), as the AIC and Kenward-Roger's test p-values  
266 indicate improvement whereas the BIC values greater by more than 10 points  
267 suggest deterioration (Burnham & Anderson, 2004). Further results (see Table S1)  
268 did not support a differential role of global priors in temporal reproduction of long  
269 intervals under LSD (3-way interaction),  $\beta=.01$  (95% CI [-.46, .39]),  $SE=.21$ ,  $t=.03$ ,  
270  $p=.98$ . These observations seemingly contradict our prediction that the influence of  
271 global prior on central tendency bias is reduced in LSD condition. Indeed, rather than  
272 diminishing the influence of priors, LSD appears to have produced an increased  
273 reliance on them that generalized across stimulus intervals. In the placebo condition,  
274 the reproduced intervals follow the pattern of the global prior (albeit with overall  
275 under-reproduction), whereas in the LSD condition, the slope is steeper (Figure 2a),  
276 Drug \* Global priors,  $\beta=.50$  (95% CI [.02, .94]),  $SE=.22$ ,  $t=2.22$ ,  $p=.030$ .

277 To test whether this effect contributed to reduced under-reproduction of longer  
278 stimulus intervals under LSD (Figure 1; Yanakieva et al., 2019), we fitted a model  
279 including Stimulus interval, Drug, and Stimulus interval \* Drug fixed-effects to  
280 responses after removing trends for global priors for each participant (Figure 2b).  
281 Although the resulting residual reproduced intervals continued to show a steeper  
282 increase with increasing stimulus intervals under LSD,  $\beta=.16$  (95% CI [.063, .272]),

283 SE=.05,  $t=3.02$ ,  $p=.004$ , the difference in under-reproduction bias across drug  
284 groups was no longer significant for three out of five previously significant long  
285 intervals (2.4, 2.8 and 4s, Holm-Bonferroni corrected  $p>.05$ ). The mean reproduced  
286 intervals did not differ across group,  $\beta= -.01$  (95% CI [-.039, .034]), SE=.02,  $t=-.25$ ,  
287  $p=.80$ . These analyses demonstrate that global priors partly shaped the pattern of  
288 the original observations (Yanakieva et al., 2019) although not via their reduced  
289 impact under psychedelics (Carhart-Harris & Friston, 2019).  
290

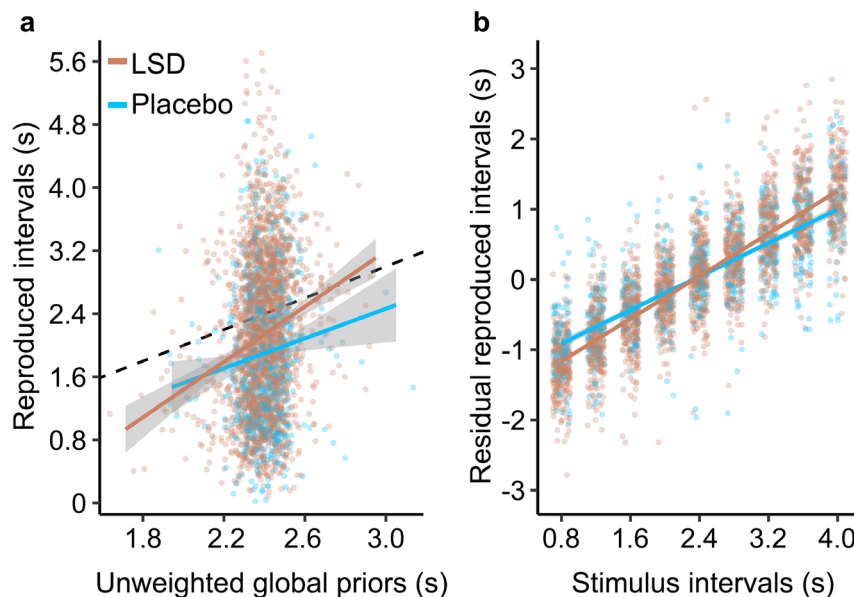

291  
292 **Figure 2.** The effects of global priors on temporal reproduction performance in  
293 placebo and LSD conditions. **a.** Reproduced intervals (individual trial responses) as  
294 a function of unweighted global priors in each drug condition. The black dashed line  
295 represents the responses identical to global prior values. **b.** Residual reproduced  
296 intervals after removing the linear trend for global prior for each participant (see  
297 Figure 1 for raw reproduced intervals). Both panels: Markers are individual  
298 datapoints (trials). Shaded error bars are standard error smoothed with the linear  
299 *geom\_smooth* function in R.

300

301

302 ***Local priors (unweighted)***

303 Our next analyses examined the roles of local priors in the impact of LSD on  
304 temporal reproduction. Incorporating local priors improved the model fit of both the  
305 *Baseline model* and *Replication model* (Table 1). Reproduced intervals increased  
306 with longer preceding ( $n-1$ ) stimuli,  $\beta=.07$  (95% CI [.04, .10]),  $SE=.01$ ,  $t=4.63$ ,  
307  $p<.001$ , and this effect varied across Stimulus intervals, Prior \* Stimulus interval  
308 interaction:  $\beta=.03$  (95% CI [-.01, .06]),  $SE=.01$ ,  $t=1.99$ ,  $p=.04$ . However, as with  
309 global priors, we did not find significant evidence for a Prior x Stimulus interval x  
310 Drug interaction,  $\beta= -.01$  (95% CI [-.05, .02]),  $SE=.02$ ,  $t=.52$ ,  $p=.60$ , and we did not  
311 observe an interaction between the Prior x Drug group,  $\beta= -.01$  (95% CI [-.05, .02]),  
312  $SE=.02$ ,  $t=.80$ ,  $p=.42$ . Analyses using unweighted  $n-2$  and  $n-3$  priors exhibited similar  
313 patterns of results (see Supplementary Table S1). To summarize, our observations  
314 align with previous research (de Jong et al., 2021; Wiener et al., 2014) and suggest  
315 that reproduced intervals are reliably influenced by local priors not weighted by their  
316 precision, and that LSD does not moderate these effects.

317

318 ***Precision-weighted priors and precision weights***

319 The foregoing approach can be expanded upon by considering the level of  
320 (un)certainty or precision of prior evidence, which determines how influential the  
321 priors are in shaping the responses (Petzschner et al., 2015; Sadibolova & Terhune,  
322 2022). Therefore, we repeated the analyses but substituted priors with prior precision  
323 weights accounting for how impactful the priors are, and with priors weighted by their  
324 precision. We performed these analyses with all predictors *except* the  $n-1$  priors, due  
325 to the inability to calculate their precision on trial-by-trial basis.

326 The impact of including precision weights and precision-weighted *global* priors in  
327 the *Baseline model* and *Replication model* remains inconclusive (Table 1), as the  
328 AIC and Kenward-Roger's test p-values continue to indicate improvement whereas  
329 the BIC values greater by more than 10 points suggest deterioration (Burnham &  
330 Anderson, 2004). Further results (Supplementary Table S1) indicate that the  
331 variation in reproduced time intervals between drug groups attributed to unweighted  
332 global priors (Figure 2) lost statistical significance after accounting for global prior  
333 precision weighting. Altogether, these results do not furnish compelling  
334 substantiation for the global prior accounting for Yanakieva et al.'s (2019) findings.

335 Reproduced intervals decreased with increasing n-2 prior weights,  $\beta = -.15$  (95%  
336 CI [-.26, -.05]),  $SE = .07$ ,  $t = -2.19$ ,  $p = .03$ , and n-3 prior weights,  $\beta = -.36$  (95% CI [-.55, -  
337 .17]),  $SE = .09$ ,  $t = -3.89$ ,  $p < .01$ , indicating a greater local history bias for higher  
338 precision weights, as would be expected. The reduction in reproduced intervals  
339 driven by the prior precision weights occurred at a slower pace in the LSD condition  
340 compared to the placebo condition,  $\beta = .19$  (95% CI [.07, .33]),  $SE = .08$ ,  $t = 2.38$ ,  $p = .02$   
341 (n-2 precision weights \* Drug), and  $\beta = .34$  (95% CI [.11, .55]),  $SE = .11$ ,  $t = 3.07$ ,  $p < .01$   
342 (n-3 precision weights \* Drug). For n-2 precision weights, this effect was more  
343 pronounced for long stimulus intervals (n-2 precision weights \* Drug \* Stimulus),  
344  $\beta = .19$  (95% CI [.03, .35]),  $SE = .08$ ,  $t = 2.50$ ,  $p = .01$ . Accordingly, the decrease in  
345 reproduced intervals (under-reproduction bias) as a function of n-2 priors adjusted by  
346 these precision weights was reduced for longer stimulus intervals in the LSD relative  
347 to the placebo condition,  $\beta = .07$  (95% CI [.01, .13]),  $SE = .03$ ,  $t = 2.30$ ,  $p = .02$  (Table S1).  
348 In order to determine whether this effect accounts for the observation of reduced  
349 under-reproduction of long stimulus intervals in the LSD condition (Fig 2; Yanakieva  
350 et al., 2019), we fitted the model with Stimulus interval, Drug, and Stimulus interval \*



351 Drug fixed-effects to residual reproduced intervals after removing the linear trend for  
352 precision-weighted n-2 priors for each participant. Our results suggest that the LSD-  
353 mediated reduced bias in the original study by Yanakieva and colleagues (2019) was  
354 indeed no longer significant after accounting for the influence of the precision-  
355 weighted n-2 priors,  $\beta=-.01$  (95% CI [-.05, .03]),  $SE=.06$ ,  $t=-0.29$ ,  $p=.77$ , and the  
356 across-condition differences for individual long stimulus intervals were not  
357 statistically significant (Holm-Bonferroni corrected  $ps>.05$ ). Taken together, our  
358 results suggest that reduced precision-weighting of local temporal priors underlies  
359 altered time perception in LSD (Yanakieva et al., 2019).

360

361

362

## Discussion

363 In this re-analysis of existing data (Yanakieva et al., 2019), we examined whether  
364 LSD alters time perception by modulating the impact of temporal priors on temporal  
365 reproduction. We predicted that the REBUS model's theorized reduced impact of  
366 priors under psychedelics (Carhart-Harris & Friston, 2019) would remedy the  
367 temporal reproduction bias (i.e. the tendency for reproduced intervals to shift toward  
368 priors and away from objective interval durations). We found that the impact of *global*  
369 priors (unweighted by their precision) on temporal reproduction was more  
370 pronounced under LSD, contrary to the REBUS model predictions. However, the  
371 difference in reproduced intervals across drug groups was not fully eliminated when  
372 the influence of the global priors was controlled for, suggesting that they only partly  
373 explained group variation in Yanakieva et al.'s data. Moreover, the impact of the  
374 global priors on temporal reproduction was similar in both drug groups once they  
375 were weighted by their precision. By comparison, *local* prior precision and precision-

376 weighted priors were associated with tempered under-reproduction of longer  
377 stimulus durations in the LSD group. Reproduced intervals decreased with  
378 increasing local prior precision weights, indicating a greater local history bias for  
379 higher prior precision, and the reduction in reproduced intervals driven by precision  
380 weights occurred at a slower pace in the LSD group compared to the placebo group.  
381 Further analyses showed that these effects accounted for the original observation  
382 (Yanakieva et al., 2019), given that the reproduced long intervals did not significantly  
383 differ across drug groups once the impact of the precision-weighted local prior was  
384 controlled for. These results suggest that altered temporal reproduction under LSD  
385 (Yanakieva et al., 2019) may be explained by local temporal priors in line with the  
386 proposal that psychedelics reduce the impact of priors (Carhart-Harris & Friston,  
387 2019; Safron et al., 2020).

388 The REBUS model (Carhart-Harris & Friston, 2019) supports these findings by  
389 suggesting that psychedelics decrease the confidence of priors and reduce their  
390 constraining effect on the processing of incoming information (prediction errors).  
391 According to this model, the relaxation of priors is most evident at high levels of the  
392 processing hierarchy, such as those associated with the default-mode network,  
393 which are linked to self-hood, identity, and ego (Carhart-Harris et al., 2012).  
394 However, the model also proposes that a wide range of functional levels will be  
395 impacted, including priors at intermediate levels of the processing hierarchy, albeit  
396 potentially with less conspicuous psychological effects (Carhart-Harris & Friston,  
397 2019). Accordingly, our findings suggest that temporal reproduction under LSD is  
398 less influenced by temporal priors and therefore exhibits less bias under LSD. Our  
399 observations broadly align with previous research on the LSD-mediated reduced  
400 influence of priors on perception. For instance, LSD was found to reduce the brain's

401 ability to detect and respond to unexpected or deviant auditory stimuli, as indicated  
402 by the diminished amplitude of the mismatch negativity component in response to  
403 auditory stimuli (Timmermann et al., 2018). This was attributed to LSD reducing the  
404 precision of the brain's internal models of expected input. Additionally, the reduced  
405 Kanizsa illusion, which relies on top-down predictions from higher visual areas,  
406 provides further evidence of the impact of psychedelics on priors (Kometer et al.,  
407 2011). Altogether, these findings provide valuable insights into the effects of  
408 psychedelics on sensory processing and prior predictions in shaping perception.

409 It has been repeatedly demonstrated that LSD and germane psychedelics induce  
410 pronounced alterations in perception of time, yet the neurocognitive and  
411 neurochemical mechanisms underlying these effects have not been fully understood  
412 (Altman, 1977; Aronson, 1959; Kenna & Sedman, 1964; Passie et al., 2008;  
413 Wittmann et al., 2007). Recent predictive processing theories, such as the REBUS  
414 model, offer a new perspective, proposing that psychedelics exert their influence on  
415 cognition by increasing the excitability of deep-layer pyramidal neurons that express  
416 5-HT receptors (Carhart-Harris & Friston, 2019; Nichols, 2016; Safron et al., 2020).  
417 According to the model, the overly excitable neurons fail to synchronize, thereby  
418 reducing the influence of top-down priors and increasing the likelihood of the system  
419 being updated by unsuppressed ascending prediction errors. In this way, the REBUS  
420 model suggests that psychedelics afford a greater latitude for belief updating  
421 throughout the processing hierarchy (Carhart-Harris & Friston, 2019; Nichols, 2016;  
422 Safron et al., 2020) although the evidence for this neurocognitive mechanism and its  
423 neurochemical instantiation in temporal perception is currently underspecified.  
424 Future research will benefit from investigating the neural mechanisms underpinning

425 our observations to shed further light into how they align with these theoretical  
426 accounts.

427 Notably, the effects of LSD have been linked not only to its psychedelic  
428 properties via the activation of serotonin 5-HT receptors, but also to its  
429 psychostimulant properties via dopamine D1 and D2 receptors and dissociative  
430 properties via NMDA glutamate transmission (Marona-Lewicka & Nichols, 2007;  
431 Nichols, 2004; Passie et al., 2008). The dopamine system, in particular, has been  
432 widely implicated in altered temporal perception (for reviews, see Agostino & Cheng,  
433 2016; Coull, Cheng, et al., 2011; Marinho et al., 2018). Interestingly, whereas the  
434 serotonin 5-HT agonism has been discussed in the context of psychedelic relaxation  
435 (down-weighting) of priors for its therapeutic effects in psychopharmacological  
436 models of psychotic hallucinations (Corlett et al., 2019; Haarsma et al., 2021; Rajpal  
437 et al., 2022), there is evidence for elevated striatal dopamine being associated with  
438 an over-reliance on priors (Cassidy et al., 2018). Furthermore, the LSD has been  
439 shown to decrease dopamine firing activity through 5-HT, D2 and TAAR1 receptors  
440 (De Gregorio et al., 2016; Marona-Lewicka & Nichols, 2007). Accordingly, an  
441 alternative interpretation of the present results is that an LSD-mediated reduction in  
442 striatal dopamine levels yielded the observed attenuation of precision-weighting of  
443 local temporal priors underlying the observed altered timing performance (Yanakieva  
444 et al., 2019). Further work is required to discriminate between these competing  
445 neurochemical interpretations. Additionally, the relationship between dopamine and  
446 serotonin systems in the effects of LSD on temporal perception warrants further  
447 investigation, as both systems may have opposing effects on temporal priors  
448 (Carhart-Harris & Friston, 2019; Cassidy et al., 2018).

449       Alternatively, our findings could be interpreted as resulting from increased  
450 information flow due to reduced thalamic gating under the cortico-striatal  
451 thalamocortical (CSTC) model (Preller et al., 2019). This model proposes that LSD,  
452 acting as a serotonergic agonist, diminishes the striatal influence on the thalamus,  
453 thus opening the thalamic filter. This interpretation is consistent with predictive  
454 processing accounts, which frame thalamic gating and increased "bottom-up"  
455 information flow to cortical areas in terms of the heightened precision of ascending  
456 prediction errors (likelihood) (Clark, 2013, 2016). This process reflects the gain on  
457 incoming information at the expense of priors, which in the case of temporal priors  
458 and their associated biases, leads to a reduction in reproduction biases under LSD,  
459 as observed in this study. Recent accounts of the CSTC model have further  
460 expanded its scope by including the claustrum, which is densely populated by 5-HT  
461 receptors and has been implicated in the temporal integration of cortical and  
462 thalamic oscillations for interval timing and working memory (Doss et al., 2022; Yin et  
463 al., 2016). Thus, future research would additionally benefit from investigating the  
464 roles of the thalamus and claustrum in mediating LSD's effects on temporal priors in  
465 temporal perception.

466       Moving from the discussion of neurocognitive and neurochemical bases of the  
467 observed effects, it is worth exploring the significance of LSD micro-dosing. A typical  
468 full dose of LSD ranges from 75-150 µg and produces a diverse array of  
469 phenomenological effects such as hallucinations, ego dissolution and altered  
470 perception of space and time (Passie et al., 2008). By comparison, the  
471 phenomenological effects of LSD micro-dosing are minimal (Yanakieva et al., 2019).  
472 Therefore, unlike explicit psychoactive effects of LSD (e.g., mystical experiences)  
473 and putative therapeutic effects (e.g., antidepressant effects), which are plausibly

474 shaped in part by participants' expectancies (Burke & Blumberger, 2021; Butler et  
475 al., 2022; Olson et al., 2020), it is unlikely that participants expect to exhibit reduced  
476 temporal under-reproduction under LSD. This strongly suggests that the observed  
477 results are not attributable to explicit expectations, as has been suggested for other  
478 effects of microdose psychedelics (Kaertner et al., 2021). Future research could  
479 expand upon the present work by more stringently manipulating temporal priors  
480 under different LSD doses and investigating the role of specific neurochemical  
481 systems.

482 To summarize, our study has shed light on the intricate ways in which LSD  
483 impacts temporal reproduction by modulating local and global temporal priors.  
484 Specifically, we have demonstrated that even small doses of LSD can interact with  
485 local temporal priors, resulting in alterations in temporal reproduction. Our findings  
486 are underpinned by existing theoretical models based on the predictive coding  
487 framework, which offer a potential explanation for the observed effects. The results  
488 of this study pave the way for future research to further explore these underlying  
489 mechanisms. Overall, our findings align with the REBUS model of the effects of  
490 psychedelics on cognition (Carhart-Harris & Friston, 2019), suggesting that low  
491 doses of psychedelics have the potential to alleviate temporal biases imposed by  
492 temporal priors. These exciting results represent an important step in advancing our  
493 understanding of the effects of psychedelics on temporal perception.

494

495

## References

496

Acerbi, L., Wolpert, D. M., & Vijayakumar, S. (2012). Internal representations of

497

temporal statistics and feedback calibrate motor-sensory interval timing. *PLoS*

498

*Computational Biology*, 8(11), e1002771.

499

<https://doi.org/10.1371/journal.pcbi.1002771>

500

Agostino, P. V., & Cheng, R.-K. K. (2016). Contributions of dopaminergic signaling to

501

timing accuracy and precision. *Current Opinion in Behavioral Sciences*, 8, 153–

502

160. <https://doi.org/10.1016/j.cobeha.2016.02.013>

503

Akaike, H. (1974). A new look at the statistical model identification. *IEEE*

504

*Transactions on Automatic Control*, 19(6), 716–723.

505

<https://doi.org/10.1109/TAC.1974.1100705>

506

Altman, J. L. (1977). Drugs and the production of temporal intervals in the rat.

507

*Progress in Neuro-Psychopharmacology*, 1(3–4), 301–308.

508

[https://doi.org/10.1016/0364-7722\(77\)90055-8](https://doi.org/10.1016/0364-7722(77)90055-8)

509

Aronson, H. (1959). Influence of Lysergic Acid Diethylamide (LSD) on subjective

510

time. *Archives of General Psychiatry*, 1(5), 469.

511

<https://doi.org/10.1001/archpsyc.1959.03590050037003>

512

Aston, S., Negen, J., Nardini, M., & Beierholm, U. (2021). Central tendency biases

513

must be accounted for to consistently capture Bayesian cue combination in

514

continuous response data. *Behavior Research Methods*, 54(1), 508–521.

515

<https://doi.org/10.3758/s13428-021-01633-2>

516

Barr, D. J., Levy, R., Scheepers, C., & Tily, H. J. (2013). Random effects structure

517

for confirmatory hypothesis testing: Keep it maximal. *Journal of Memory and*

518

*Language*, 68(3), 255–278. <https://doi.org/10.1016/j.jml.2012.11.001>

519

Bates, D., Mächler, M., Bolker, B., & Walker, S. (2015). Fitting linear mixed-effects

- 520 models using lme4. *Journal of Statistical Software*, 67(1), 1–48.
- 521 <https://doi.org/10.18637/jss.v067.i01>
- 522 Burke, M. J., & Blumberger, D. M. (2021). Caution at psychiatry’s psychedelic  
523 frontier. *Nature Medicine*, 27(10), 1687–1688. [https://doi.org/10.1038/s41591-](https://doi.org/10.1038/s41591-021-01524-1)  
524 [021-01524-1](https://doi.org/10.1038/s41591-021-01524-1)
- 525 Burnham, K. P., & Anderson, D. R. (2004). Multimodel inference: Understanding AIC  
526 and BIC in model selection. *Sociological Methods & Research*, 33(2), 261–304.  
527 <https://doi.org/10.1177/0049124104268644>
- 528 Butler, M., Jelen, L., & Rucker, J. (2022). Expectancy in placebo-controlled trials of  
529 psychedelics: if so, so what? *Psychopharmacology*, 239(10), 3047–3055.  
530 <https://doi.org/10.1007/s00213-022-06221-6>
- 531 Calder, A. E., & Hasler, G. (2022). Towards an understanding of psychedelic-  
532 induced neuroplasticity. *Neuropsychopharmacology*.  
533 <https://doi.org/10.1038/s41386-022-01389-z>
- 534 Carhart-Harris, R. L., Erritzoe, D., Williams, T., Stone, J. M., Reed, L. J., Colasanti,  
535 A., Tyacke, R. J., Leech, R., Malizia, A. L., Murphy, K., Hobden, P., Evans, J.,  
536 Feilding, A., Wise, R. G., & Nutt, D. J. (2012). Neural correlates of the  
537 psychedelic state as determined by fMRI studies with psilocybin. *Proceedings of*  
538 *the National Academy of Sciences*, 109(6), 2138–2143.  
539 <https://doi.org/10.1073/pnas.1119598109>
- 540 Carhart-Harris, R. L., & Friston, K. J. (2019). REBUS and the Anarchic Brain: Toward  
541 a Unified Model of the Brain Action of Psychedelics. *Pharmacological Reviews*,  
542 71(3), 316–344. <https://doi.org/10.1124/pr.118.017160>
- 543 Carhart-Harris, R. L., & Goodwin, G. M. (2017). The Therapeutic Potential of  
544 Psychedelic Drugs: Past, Present, and Future. *Neuropsychopharmacology*,



- 545 42(11), 2105–2113. <https://doi.org/10.1038/npp.2017.84>
- 546 Cassidy, C. M., Balsam, P. D., Weinstein, J. J., Rosengard, R. J., Slifstein, M., Daw,  
547 N. D., Abi-Dargham, A., & Horga, G. (2018). A perceptual inference mechanism  
548 for hallucinations linked to striatal dopamine. *Current Biology*, 28(4), 503–514.  
549 <https://doi.org/10.1016/j.cub.2017.12.059>
- 550 Cicchini, G. M., Arrighi, R., Cecchetti, L., Giusti, M., & Burr, D. C. (2012). Optimal  
551 encoding of interval timing in expert percussionists. *Journal of Neuroscience*,  
552 32(3), 1056–1060. <https://doi.org/10.1523/JNEUROSCI.3411-11.2012>
- 553 Clark, A. (2013). Whatever next? Predictive brains, situated agents, and the future of  
554 cognitive science. *Behavioral and Brain Sciences*, 36(3), 181–204.  
555 <https://doi.org/10.1017/S0140525X12000477>
- 556 Clark, A. (2016). *Surfing uncertainty: Prediction, action and embodied mind*. Oxford  
557 University Press.
- 558 Corlett, P. R., Horga, G., Fletcher, P. C., Alderson-Day, B., Schmack, K., & Powers,  
559 A. R. (2019). Hallucinations and strong priors. In *Trends in Cognitive Sciences*  
560 (Vol. 23, Issue 2, pp. 114–127). Elsevier Current Trends.  
561 <https://doi.org/10.1016/j.tics.2018.12.001>
- 562 Coull, J. T., Cheng, R.-K., & Meck, W. H. (2011). Neuroanatomical and  
563 neurochemical substrates of timing. *Neuropsychopharmacology*, 36(1), 3–25.  
564 <https://doi.org/10.1038/npp.2010.113>
- 565 Coull, J. T., Morgan, H., Cambridge, V. C., Moore, J. W., Giorlando, F., Adapa, R.,  
566 Corlett, P. R., & Fletcher, P. C. (2011). Ketamine perturbs perception of the flow  
567 of time in healthy volunteers. *Psychopharmacology*, 218(3), 543–556.  
568 <https://doi.org/10.1007/s00213-011-2346-9>
- 569 De Gregorio, D., Posa, L., Ochoa-Sanchez, R., McLaughlin, R., Maione, S., Comai,

- 570 S., & Gobbi, G. (2016). The hallucinogen d -lysergic diethylamide (LSD)  
571 decreases dopamine firing activity through 5-HT 1A , D 2 and TAAR 1 receptors.  
572 *Pharmacological Research*, 113, 81–91.  
573 <https://doi.org/10.1016/j.phrs.2016.08.022>
- 574 de Jong, J., Akyürek, E. G., & van Rijn, H. (2021). A common dynamic prior for time  
575 in duration discrimination. *Psychonomic Bulletin & Review*, 28(4), 1183–1190.  
576 <https://doi.org/10.3758/s13423-021-01887-z>
- 577 Doss, M. K., Madden, M. B., Gaddis, A., Nebel, M. B., Griffiths, R. R., Mathur, B. N.,  
578 & Barrett, F. S. (2022). Models of psychedelic drug action: modulation of  
579 cortical-subcortical circuits. *Brain*, 145(2), 441–456.  
580 <https://doi.org/10.1093/brain/awab406>
- 581 Family, N., Maillet, E. L., Williams, L. T. J., Krediet, E., Carhart-Harris, R. L.,  
582 Williams, T. M., Nichols, C. D., Goble, D. J., & Raz, S. (2020). Safety,  
583 tolerability, pharmacokinetics, and pharmacodynamics of low dose lysergic acid  
584 diethylamide (LSD) in healthy older volunteers. *Psychopharmacology*, 237(3),  
585 841–853. <https://doi.org/10.1007/s00213-019-05417-7>
- 586 Friston, K. J. (2009). The free-energy principle: a rough guide to the brain? *Trends in*  
587 *Cognitive Sciences*, 13(7), 293–301. <https://doi.org/10.1016/j.tics.2009.04.005>
- 588 Haarsma, J., Harmer, C. J., & Tamm, S. (2021). A continuum hypothesis of  
589 psychotomimetic rapid antidepressants. *Brain and Neuroscience Advances*, 5,  
590 239821282110077. <https://doi.org/10.1177/23982128211007772>
- 591 Halekoh, U., & Højsgaard, S. (2014). A Kenward-Roger approximation and  
592 parametric bootstrap methods for tests in linear mixed models - The R package  
593 pbkrtest. *Journal of Statistical Software*, 59(9), 1–32.  
594 <https://doi.org/10.18637/jss.v059.i09>

- 595 Jazayeri, M., & Shadlen, M. N. (2010). Temporal context calibrates interval timing.  
596 *Nature Neuroscience*, 13(8), 1020–1026. <https://doi.org/10.1038/nn.2590>
- 597 Johnston, J. N., Kadriu, B., Allen, J., Gilbert, J. R., Henter, I. D., & Zarate, C. A.  
598 (2023). Ketamine and serotonergic psychedelics: An update on the mechanisms  
599 and biosignatures underlying rapid-acting antidepressant treatment.  
600 *Neuropharmacology*, 226, 109422.  
601 <https://doi.org/10.1016/j.neuropharm.2023.109422>
- 602 Kaertner, L. S., Steinborn, M. B., Kettner, H., Spriggs, M. J., Roseman, L., Buchborn,  
603 T., Balaet, M., Timmermann, C., Erritzoe, D., & Carhart-Harris, R. L. (2021).  
604 Positive expectations predict improved mental-health outcomes linked to  
605 psychedelic microdosing. *Scientific Reports*, 11(1), 1941.  
606 <https://doi.org/10.1038/s41598-021-81446-7>
- 607 Karaminis, T., Cicchini, G. M., Neil, L., Cappagli, G., Aagten-Murphy, D., Burr, D., &  
608 Pellicano, E. (2016). Central tendency effects in time interval reproduction in  
609 autism. *Scientific Reports*, 6(1), 28570. <https://doi.org/10.1038/srep28570>
- 610 Kenna, J. C., & Sedman, G. (1964). The subjective experience of time during  
611 lysergic acid diethylamide (LSD-25) intoxication. *Psychopharmacologia*, 5(4),  
612 280–288. <https://doi.org/10.1007/BF02341260>
- 613 Keppel, G., & Wickens, T. D. (2004). *Design and analysis: A researcher's handbook*  
614 (4th Ed.). Pearson.
- 615 Komater, M., Cahn, B. R., Andel, D., Carter, O. L., & Vollenweider, F. X. (2011). The  
616 5-HT<sub>2A/1A</sub> agonist psilocybin disrupts modal object completion associated with  
617 visual hallucinations. *Biological Psychiatry*, 69(5), 399–406.  
618 <https://doi.org/10.1016/j.biopsych.2010.10.002>
- 619 Körding, K. P., & Wolpert, D. M. (2006). Bayesian decision theory in sensorimotor

- 620 control. *Trends in Cognitive Sciences*, 10(7), 319–326.
- 621 <https://doi.org/10.1016/j.tics.2006.05.003>
- 622 Kuznetsova, A., Brockhoff, P. B., & Christensen, R. H. B. (2017). LmerTest package:  
623 Tests in linear mixed effects models. *Journal of Statistical Software*, 82(13), 1–  
624 26. <https://doi.org/10.18637/jss.v082.i13>
- 625 Leptourgos, P., Bouttier, V., Denève, S., & Jardri, R. (2022). From hallucinations to  
626 synaesthesia: A circular inference account of unimodal and multimodal  
627 erroneous percepts in clinical and drug-induced psychosis. *Neuroscience &*  
628 *Biobehavioral Reviews*, 135, 104593.  
629 <https://doi.org/10.1016/j.neubiorev.2022.104593>
- 630 Lewis-Healey, E., Laukkonen, R., & van Elk, M. (2022). Future Directions for Clinical  
631 Psilocybin Research: The Relaxed Symptom Network. *Psychology and*  
632 *Neuroscience*. <https://doi.org/10.1037/pne0000290>
- 633 Marinho, V., Oliveira, T., Rocha, K., Ribeiro, J., Magalhães, F., Bento, T., Pinto, G.  
634 R., Velasques, B., Ribeiro, P., Di Giorgio, L., Orsini, M., Gupta, D. S.,  
635 Bittencourt, J., Bastos, V. H., & Teixeira, S. (2018). The dopaminergic system  
636 dynamic in the time perception: a review of the evidence. *International Journal*  
637 *of Neuroscience*, 128(3), 262–282.  
638 <https://doi.org/10.1080/00207454.2017.1385614>
- 639 Marona-Lewicka, D., & Nichols, D. E. (2007). Further evidence that the delayed  
640 temporal dopaminergic effects of LSD are mediated by a mechanism different  
641 than the first temporal phase of action. *Pharmacology Biochemistry and*  
642 *Behavior*, 87(4), 453–461. <https://doi.org/10.1016/j.pbb.2007.06.001>
- 643 Muthukumaraswamy, S. D., Carhart-Harris, R. L., Moran, R. J., Brookes, M. J.,  
644 Williams, T. M., Erntizoe, D., Sessa, B., Papadopoulos, A., Bolstridge, M., Singh,

- 645 K. D., Feilding, A., Friston, K. J., & Nutt, D. J. (2013). Broadband Cortical  
646 Desynchronization Underlies the Human Psychedelic State. *The Journal of*  
647 *Neuroscience*, 33(38), 15171–15183.  
648 <https://doi.org/10.1523/JNEUROSCI.2063-13.2013>
- 649 Nichols, D. E. (2004). Hallucinogens. *Pharmacology & Therapeutics*, 101(2), 131–  
650 181. <https://doi.org/10.1016/j.pharmthera.2003.11.002>
- 651 Nichols, D. E. (2016). Psychedelics. *Pharmacological Reviews*, 68(2), 264–355.  
652 <https://doi.org/10.1124/pr.115.011478>
- 653 Olson, J. A., Suissa-Rocheleau, L., Lifshitz, M., Raz, A., & Veissière, S. P. L. (2020).  
654 Tripping on nothing: placebo psychedelics and contextual factors.  
655 *Psychopharmacology*, 237(5), 1371–1382. [https://doi.org/10.1007/s00213-020-](https://doi.org/10.1007/s00213-020-05464-5)  
656 [05464-5](https://doi.org/10.1007/s00213-020-05464-5)
- 657 Passie, T., Halpern, J. H., Stichtenoth, D. O., Emrich, H. M., & Hintzen, A. (2008).  
658 The pharmacology of lysergic acid diethylamide: A review. *CNS Neuroscience &*  
659 *Therapeutics*, 14(4), 295–314. <https://doi.org/10.1111/j.1755-5949.2008.00059.x>
- 660 Pernet, C. R., Wilcox, R., & Rousselet, G. A. (2013). Robust correlation analyses:  
661 False positive and power validation using a new open source Matlab toolbox.  
662 *Frontiers in Psychology*, 3, 1–18. <https://doi.org/10.3389/fpsyg.2012.00606>
- 663 Petzschner, F. H., Glasauer, S., & Stephan, K. E. (2015). A Bayesian perspective on  
664 magnitude estimation. *Trends in Cognitive Sciences*, 19(5), 285–293.  
665 <https://doi.org/10.1016/j.tics.2015.03.002>
- 666 Pinheiro, J. C., & Bates, D. M. (2000). Mixed-effects models in S and S-PLUS. In  
667 *Mixed-Effects Models in S and S-PLUS*. Springer-Verlag.  
668 <https://doi.org/10.1007/b98882>
- 669 Powers, A. R., Kelley, M., & Corlett, P. R. (2016). Hallucinations as top-down effects

670 on perception. *Biological Psychiatry: Cognitive Neuroscience and*  
671 *Neuroimaging*, 1(5), 393–400. <https://doi.org/10.1016/j.bpsc.2016.04.003>

672 Preller, K. H., Razi, A., Zeidman, P., Stämpfli, P., Friston, K. J., & Vollenweider, F. X.  
673 (2019). Effective connectivity changes in LSD-induced altered states of  
674 consciousness in humans. *Proceedings of the National Academy of Sciences of*  
675 *the United States of America*, 116(7), 2743–2748.  
676 <https://doi.org/10.1073/pnas.1815129116>

677 Quené, H., & van den Bergh, H. (2004). On multi-level modeling of data from  
678 repeated measures designs: a tutorial. *Speech Communication*, 43(1–2), 103–  
679 121. <https://doi.org/10.1016/j.specom.2004.02.004>

680 R Core Team. (2021). *A language and environment for statistical computing*.  
681 <http://www.r-project.org/>

682 Rajpal, H., Mediano, P. A. M., Rosas, F. E., Timmermann, C. B., Brugger, S.,  
683 Muthukumaraswamy, S., Seth, A. K., Bor, D., Carhart-Harris, R. L., & Jensen, H.  
684 J. (2022). Psychedelics and schizophrenia: Distinct alterations to Bayesian  
685 inference. *NeuroImage*, 263, 119624.  
686 <https://doi.org/10.1016/j.neuroimage.2022.119624>

687 Raviv, O., Ahissar, M., & Loewenstein, Y. (2012). How recent history affects  
688 perception: The normative approach and its heuristic approximation. *PLoS*  
689 *Computational Biology*, 8(10). <https://doi.org/10.1371/journal.pcbi.1002731>

690 Sadibolova, R., & Terhune, D. B. (2022). The temporal context in bayesian models of  
691 interval timing: Recent advances and future directions. *Behavioral*  
692 *Neuroscience*, 136(5), 364–373. <https://doi.org/10.1037/bne0000513>

693 Safron, A., Lenggenhager, B., Ho, J., & Safron, A. (2020). On the varieties of  
694 conscious experiences: Altered beliefs under psychedelics (ALBUS). *PsyArXiv*.

- 695 <https://doi.org/10.31234/osf.io/zqh4b>
- 696 Schwarz, G. (1978). Estimating the dimension of a model. *The Annals of Statistics*,  
697 6(2), 461–464. <https://doi.org/10.2307/2958889>
- 698 Shi, Z., & Burr, D. (2016). Predictive coding of multisensory timing. *Current Opinion*  
699 *in Behavioral Sciences*, 8, 200–206.  
700 <https://doi.org/10.1016/j.cobeha.2016.02.014>
- 701 Shi, Z., Church, R. M., & Meck, W. H. (2013). Bayesian optimization of time  
702 perception. *Trends in Cognitive Sciences*, 17(11), 556–564.  
703 <https://doi.org/10.1016/j.tics.2013.09.009>
- 704 Singmann, H., Bolker, B., & Westfall, J. (2018). *Afex: Analysis of factorial*  
705 *experiments*. <https://rdrr.io/cran/afex/>
- 706 Teufel, C., Subramaniam, N., Dobler, V., Perez, J., Finnemann, J., Mehta, P. R.,  
707 Goodyer, I. M., & Fletcher, P. C. (2015). Shift toward prior knowledge confers a  
708 perceptual advantage in early psychosis and psychosis-prone healthy  
709 individuals. *Proceedings of the National Academy of Sciences of the United*  
710 *States of America*, 112(43), 13401–13406.  
711 <https://doi.org/10.1073/pnas.1503916112>
- 712 Timmermann, C., Spriggs, M. J., Kaelen, M., Leech, R., Nutt, D. J., Moran, R. J.,  
713 Carhart-Harris, R. L., & Muthukumaraswamy, S. D. (2018). LSD modulates  
714 effective connectivity and neural adaptation mechanisms in an auditory oddball  
715 paradigm. *Neuropharmacology*, 142, 251–262.  
716 <https://doi.org/10.1016/j.neuropharm.2017.10.039>
- 717 Wächter, A., & Biegler, L. T. (2006). On the implementation of an interior-point filter  
718 line-search algorithm for large-scale nonlinear programming. *Mathematical*  
719 *Programming*, 106(1), 25–57. <https://doi.org/10.1007/s10107-004-0559-y>

- 720 Wiener, M., Thompson, J. C., & Coslett, H. B. (2014). Continuous carryover of  
721 temporal context dissociates response bias from perceptual influence for  
722 duration. *PLoS ONE*, *9*(6), e100803.  
723 <https://doi.org/10.1371/journal.pone.0100803>
- 724 Wittmann, M., Carter, O., Hasler, F., Cahn, B. R., Grimberg, U., Spring, P., Hell, D.,  
725 Flohr, H., & Vollenweider, F. X. (2007). Effects of psilocybin on time perception  
726 and temporal control of behaviour in humans. *Journal of Psychopharmacology*,  
727 *21*(1), 50–64. <https://doi.org/10.1177/0269881106065859>
- 728 Yanakieva, S., Polychroni, N., Family, N., Williams, L. T. J., Luke, D. P., & Terhune,  
729 D. B. (2019). The effects of microdose LSD on time perception: a randomised,  
730 double-blind, placebo-controlled trial. *Psychopharmacology*, *236*(4), 1159–1170.  
731 <https://doi.org/10.1007/s00213-018-5119-x>
- 732 Yanakieva, S., Polychroni, N., Family, N., Williams, L. T. J., Luke, D. P., & Terhune,  
733 D. B. (2020). Correction to: The effects of microdose LSD on time perception: a  
734 randomised, double-blind, placebo-controlled trial. *Psychopharmacology*,  
735 *237*(12), 3803–3803. <https://doi.org/10.1007/s00213-020-05682-x>
- 736 Yin, B., Terhune, D. B., Smythies, J., & Meck, W. H. (2016). Claustrum,  
737 consciousness, and time perception. *Current Opinion in Behavioral Sciences*, *8*,  
738 258–267.  
739



740 *Figure 1.* Temporal reproduction of stimulus intervals in LSD and placebo groups.  
741 The black dashed line represents veridical performance. Markers represent  
742 individual reproduced intervals. Shaded error bars are standard error smoothed with  
743 the linear *geom\_smooth* function in R.

744

745 *Figure 2.* The effects of global priors on temporal reproduction performance in  
746 placebo and LSD conditions. **a.** Reproduced intervals (individual trial responses) as  
747 a function of unweighted global priors in each drug condition. The black dashed line  
748 represents the responses identical to global prior values. **b.** Residual reproduced  
749 intervals after removing the linear trend for global prior for each participant (see  
750 **Figure 1** for raw reproduced intervals). Both panels: Markers are individual  
751 datapoints (trials). Shaded error bars are standard error smoothed with the linear  
752 *geom\_smooth* function in R.

753

754
